# Supplementary material for: Anisotropic quasi-one-dimensional layered transition-metal trichalcogenides: synthesis, properties and applications
Source: RSC Adv. 2020 Oct 2;10(60):36413–38. doi: 10.1039/d0ra07160a (PMC9057157; doi:10.1039/d0ra07160a)
Supplement: RA-010-D0RA07160A-s001 [file RA-010-D0RA07160A-s001.pdf]

## Figures

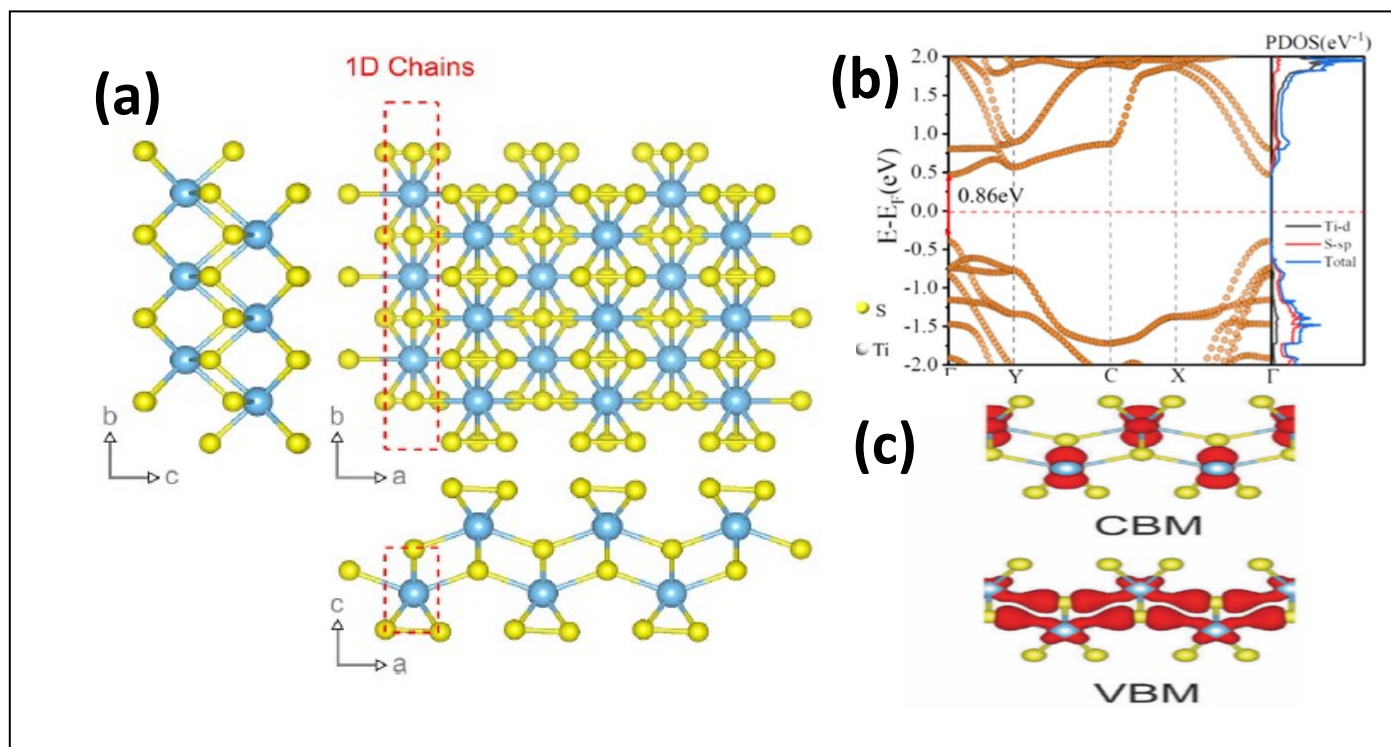

**Figure 1:** (a) Crystal structure of anisotropic  $\text{TiS}_3$  indicating the bond lengths between titanium and sulfur along the b-axis and a-axis with shorter along the b-axis, reproduced with permission from Ref- (6), copyright (2015) Springer Nature (b) Calculated electronic energy band structure along symmetry directions of the Brillouin zone ( $\Gamma$ -Y-C-X- $\Gamma$ ) and the projected density of states (PDOS) of the optimized structure of ML  $\text{TiS}_3$ . The direct band gap  $E_g$  of ML  $\text{TiS}_3$  is indicated by red arrow. The Fermi level is set as zero energy (the dashed lines), Reprinted with permission from ref no-8. Copyright (2019) from American Chemical Society (c) The charge distribution of the VBM and CBM states of monolayer  $\text{TiS}_3$ , republished with permission from ref. no.-9; permission conveyed through Copyright Clearance Center, Inc.

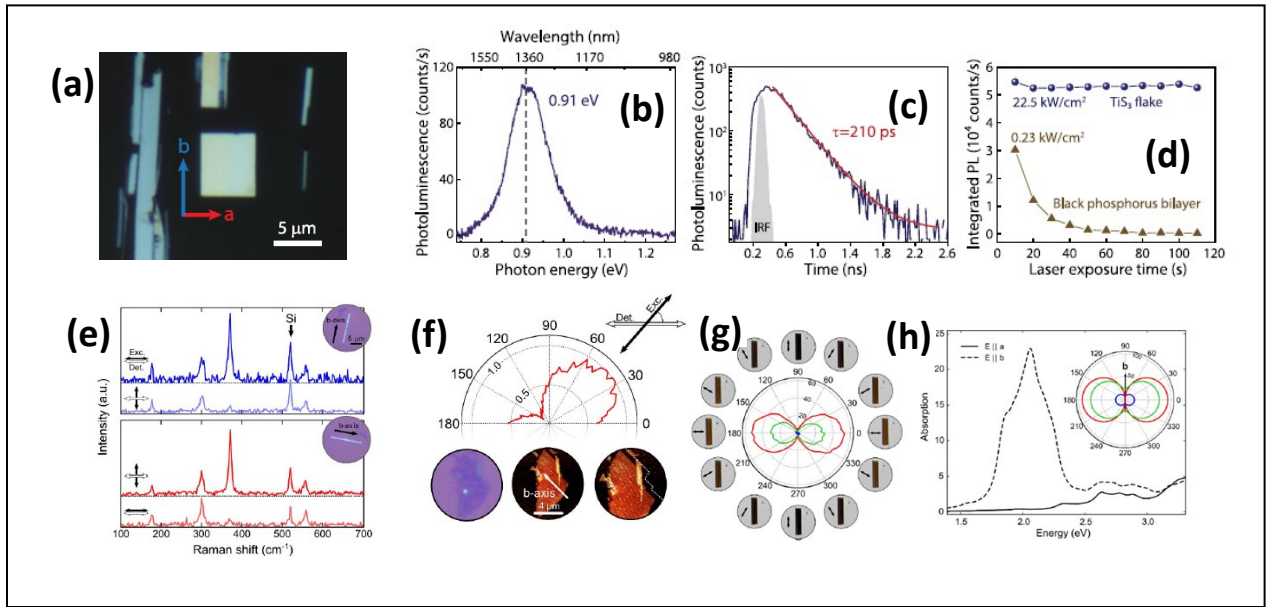

**Figure 2:** Optical properties of  $\text{TiS}_3$  flakes: (a) optical microscope image with a and b axis directions, Infrared light emission from  $\text{TiS}_3$  by (b) photoluminescence and (c) time-resolved photoluminescence, (d) photostability of a  $\text{TiS}_3$  flake compared to a black phosphorous, reproduced with permission from Ref- (6), copyright (2019) Iopscience, (e) Raman spectra of a  $\text{TiS}_3$  ribbon with horizontal excitation and detection polarization, (f) intensity of the  $370\text{ cm}^{-1}$  Raman peak of a 3 nm thick flake (3-4 layers) as a function of the excitation polarization angle, Ref no-18, (g) transmittance of the red, green and blue channels as a function of the excitation polarization angle, (h) calculated absorption spectra when the field is aligned parallel to the b-axis (dashed line) and a-axis (solid line) with the inset showing transmittance in the a-b plane for energies red (1.9 eV), green (2.4 eV), and blue (2.72 eV) excitations, reproduced with permission from Ref- (6), copyright (2015) Springer Nature.

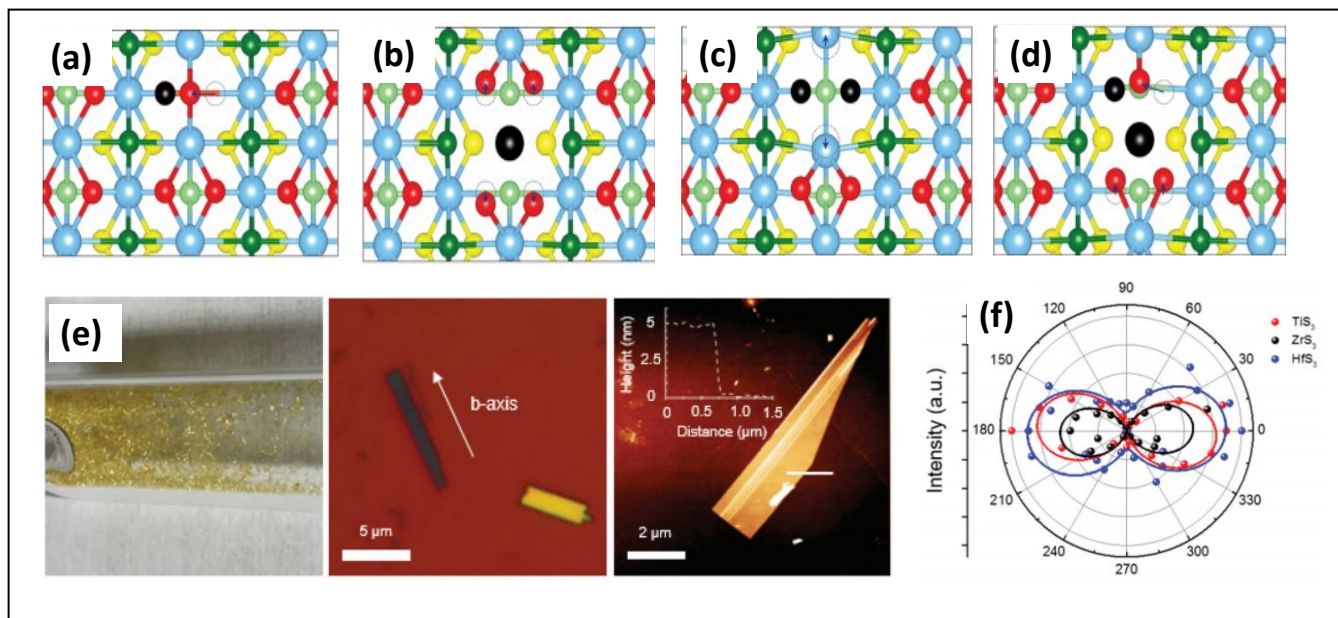

**Figure 3:** Top view of relaxed monolayer  $\text{TiS}_3$  with (a) S vacancy, (b) Ti vacancy, (c) double S vacancy, and (d) TiS vacancy. Black atoms illustrate removed atoms, and dashed circles show initial position of the displaced atom, Reproduced with permission from ref. no-19, copyright (2015) American Chemical Society, (e) Optical photograph of  $\text{HfS}_3$  needles grown on the inner walls of a quartz ampoule, optical image of  $\text{ZrS}_3$  flakes exfoliated onto  $\text{SiO}_2$  substrates with the b-axis direction shown, and an AFM image of an exfoliated  $\text{TiS}_3$  flake with thickness of  $\sim 5$  nm. (f) Polar plot of mode III at 372 (red), 320 (black), and 321  $\text{cm}^{-1}$  (blue) that correspond to thin  $\text{TiS}_3$ ,  $\text{ZrS}_3$ , and  $\text{HfS}_3$  flakes respectively, republished with permission from ref. no.-24; permission conveyed through Copyright Clearance Center, Inc.

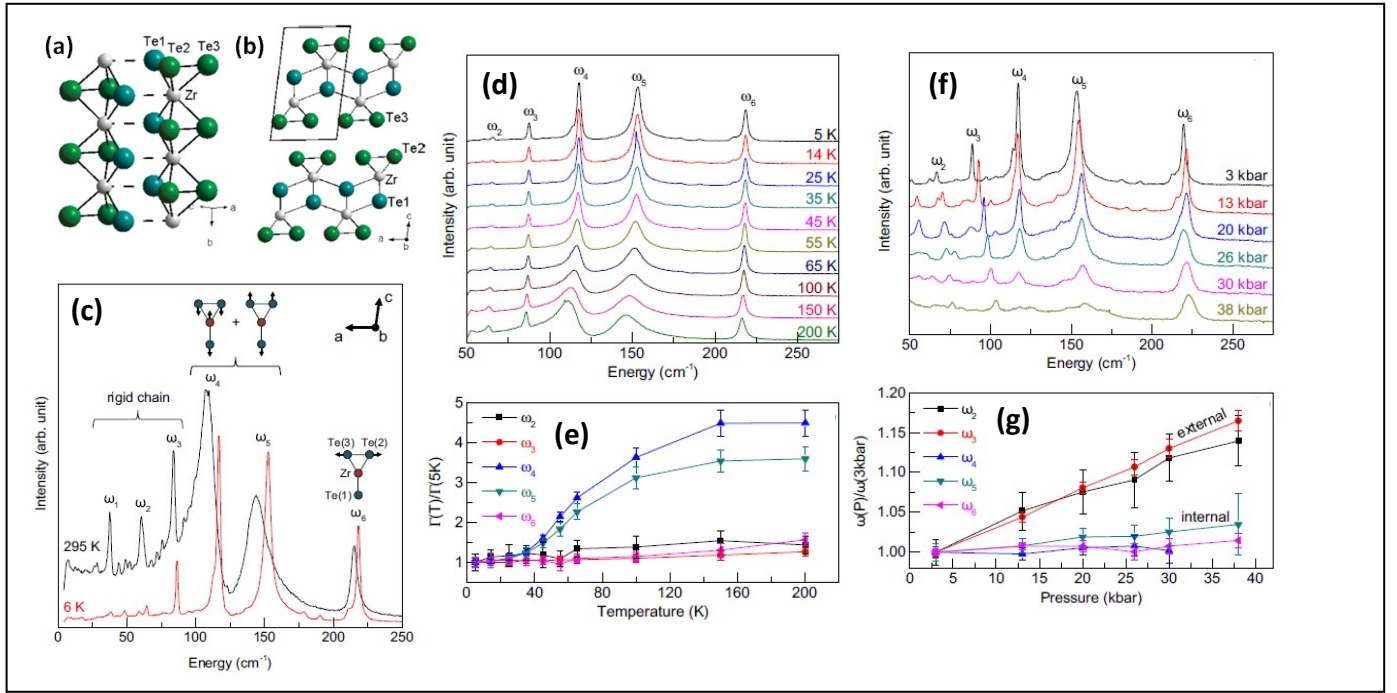

**Figure 4:** Crystal structure of ZrTe<sub>3</sub>: (a) The quasi one-dimensional trigonal prism packing along the b axis, (b) quasi two-dimensional ZrTe<sub>3</sub> layer along the a-c plane, Reprinted with permission from Ref. no-15, copyright (2013) American Physical Society (c) Raman spectra of ZrTe<sub>3</sub> at 6 K and 295 K. (d, e) Temperature dependent Raman spectra at ambient pressure and (f, g) pressure dependent Raman spectra at T=3 K, Reprinted with permission from Ref. no-36, copyright (2013) American Physical Society

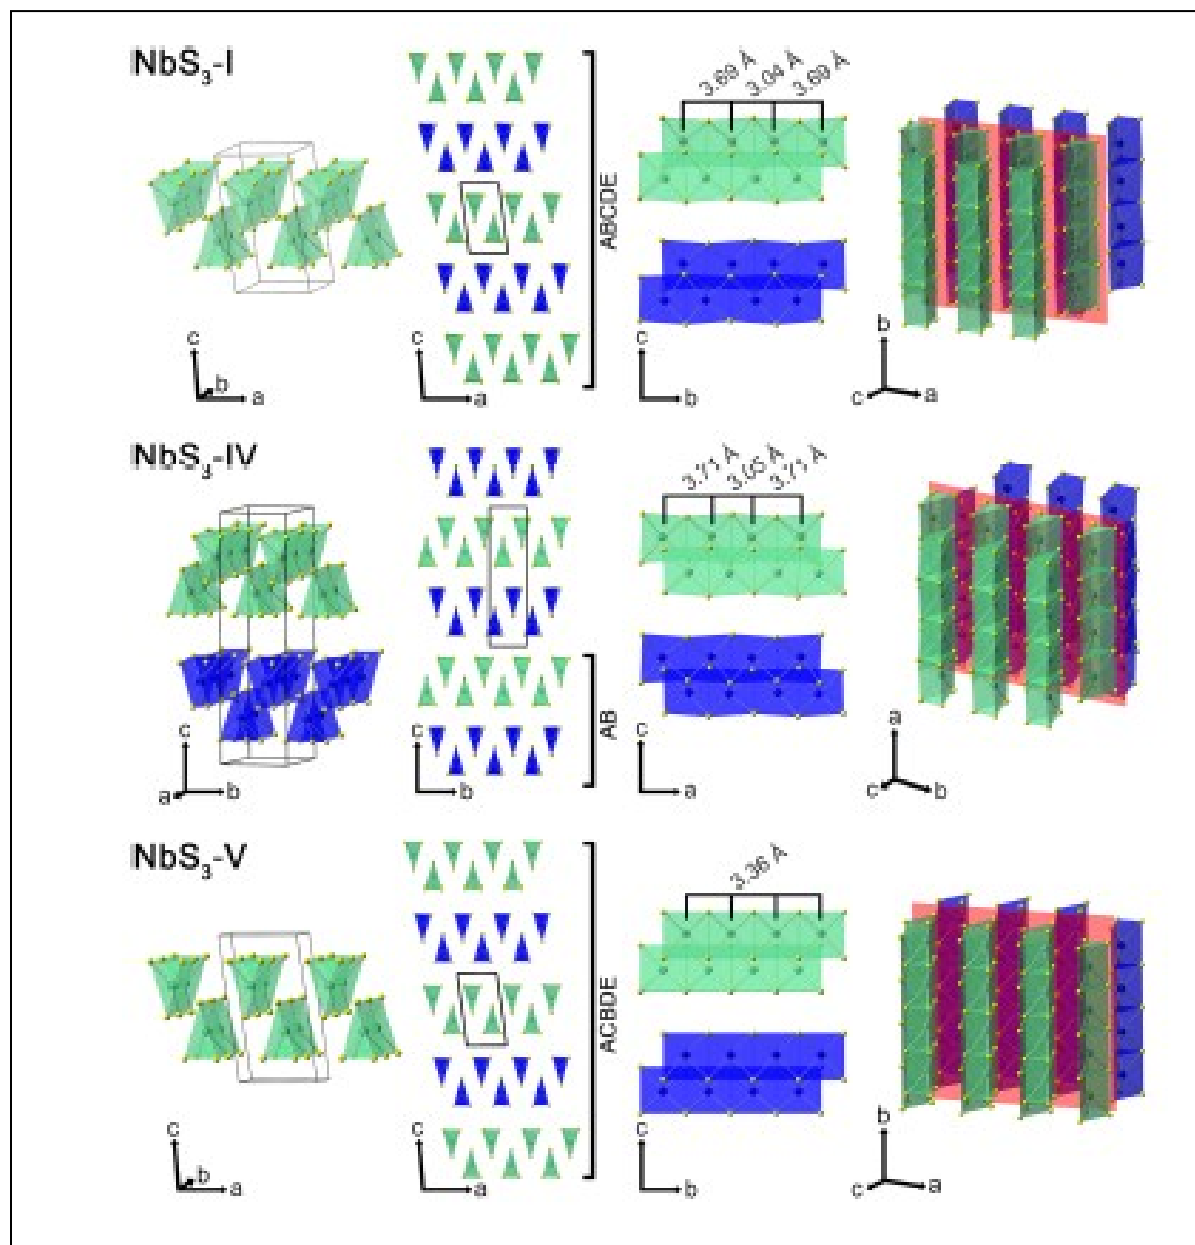

**Figure 5:** Crystal structure of NbS<sub>3</sub>-I, IV, V: Unit cell, chain cross section, layer and perspective views, Reproduced with permission from ref. no.-55, copyright (2017) Application Infrastructure Provider.

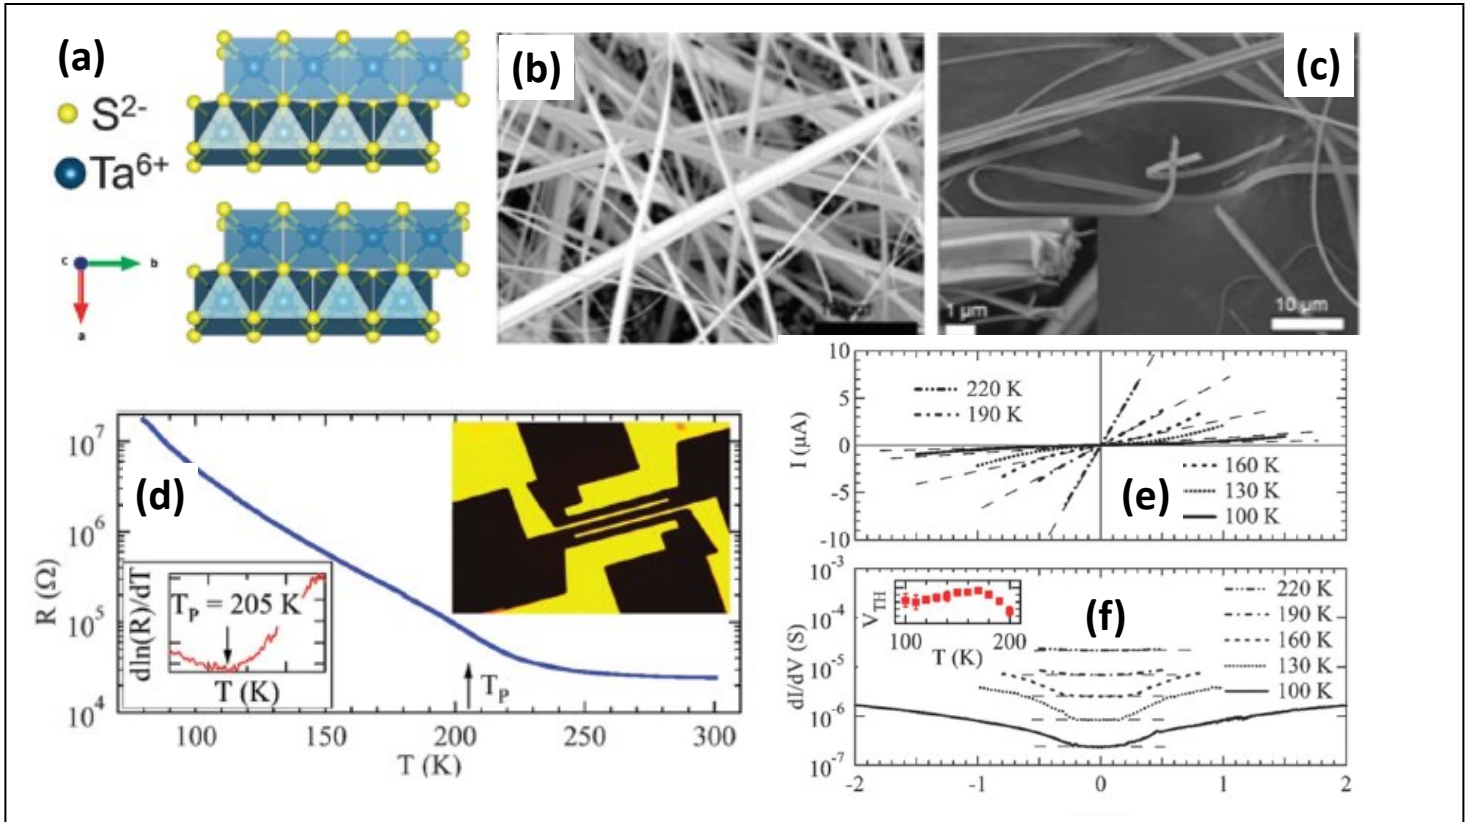

**Figure 6:** (a) Orthorhombic structure of TaS<sub>3</sub>, (b, c) FESEM images of the TaS<sub>3</sub> nanobelts, (d) temperature dependence resistance change of a single nanoribbon with the inset showing the fabricated device, (e) current-voltage curves and (f) differential conductance as a function of voltage measured at specific temperatures with the inset showing temperature dependence threshold voltage, Republished with permission from ref. no.-104; permission conveyed through Copyright Clearance Center, Inc.

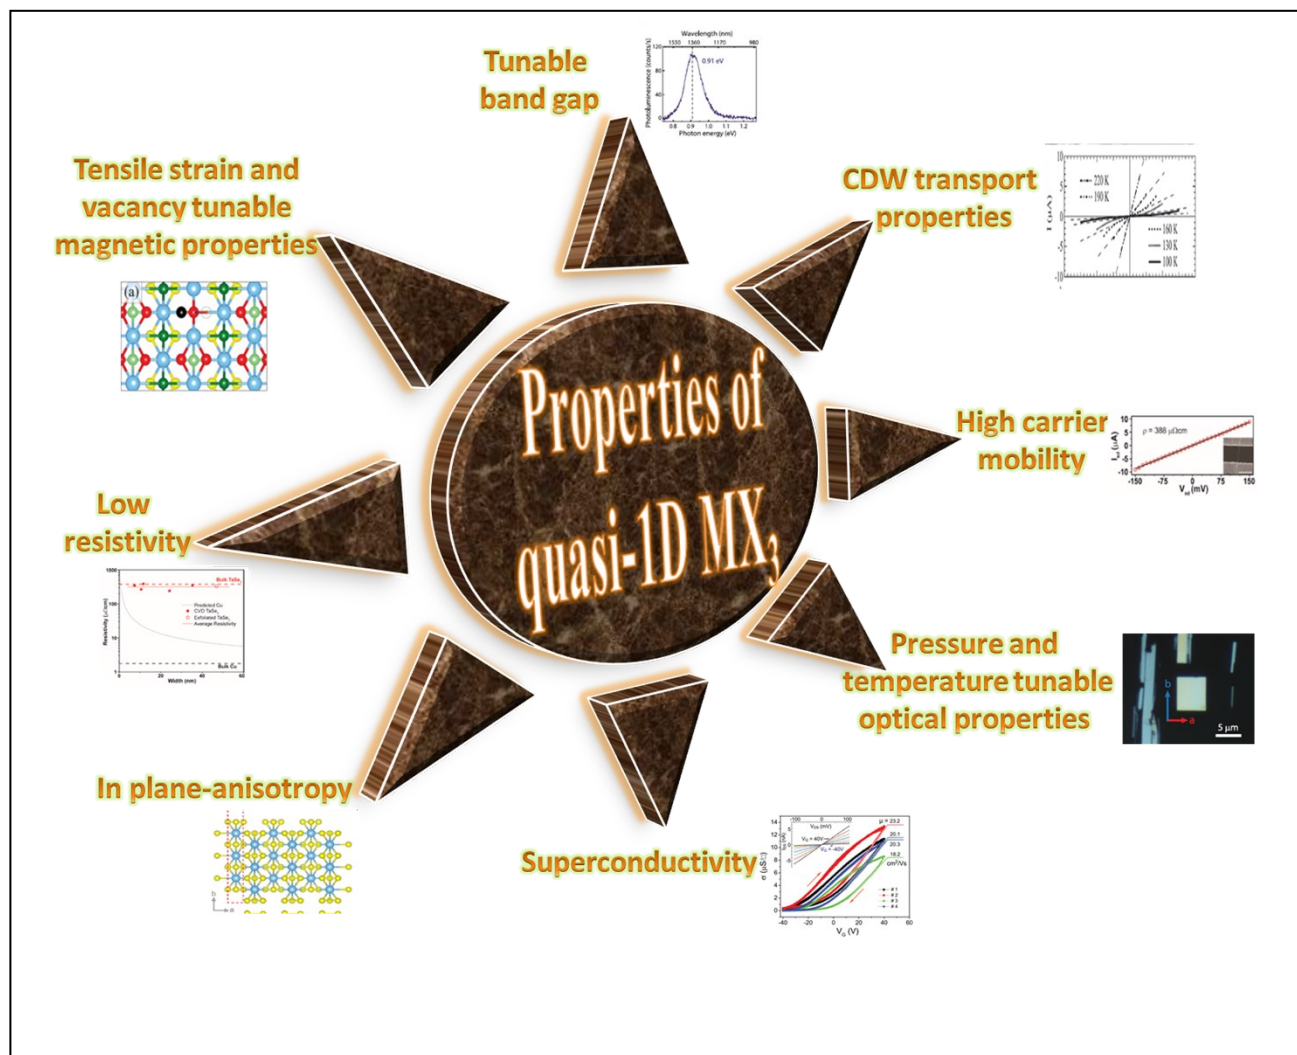

**Figure 7:** Schematic diagram showing properties of quasi-1D MX<sub>3</sub>, resistivity fig.-Reprinted with permission from Ref. no-78, copyright (2019) American chemical Society, in plane anisotropy fig.-Republished with permission of ref. no-9 permission conveyed through Copyright (2016) Clearance Center, Inc, superconductivity fig.- Reproduced with permission from ref. no.-124, copyright (2015) Royal Society of Chemistry, optical properties- reproduced with permission from Ref- (6), copyright (2019) Iopscience, carrier mobility fig.-Reprinted with permission from Ref. no-78, copyright (2019) American chemical Society, CDW properties- Republished with permission from ref. no.-104; permission conveyed through Copyright Clearance Center, Inc, band gap fig.- reproduced with permission from Ref- (6), copyright (2019) Iopscience, magnetic properties fig.- Reproduced with permission from ref. no-9, copyright (2015) American Chemical Society

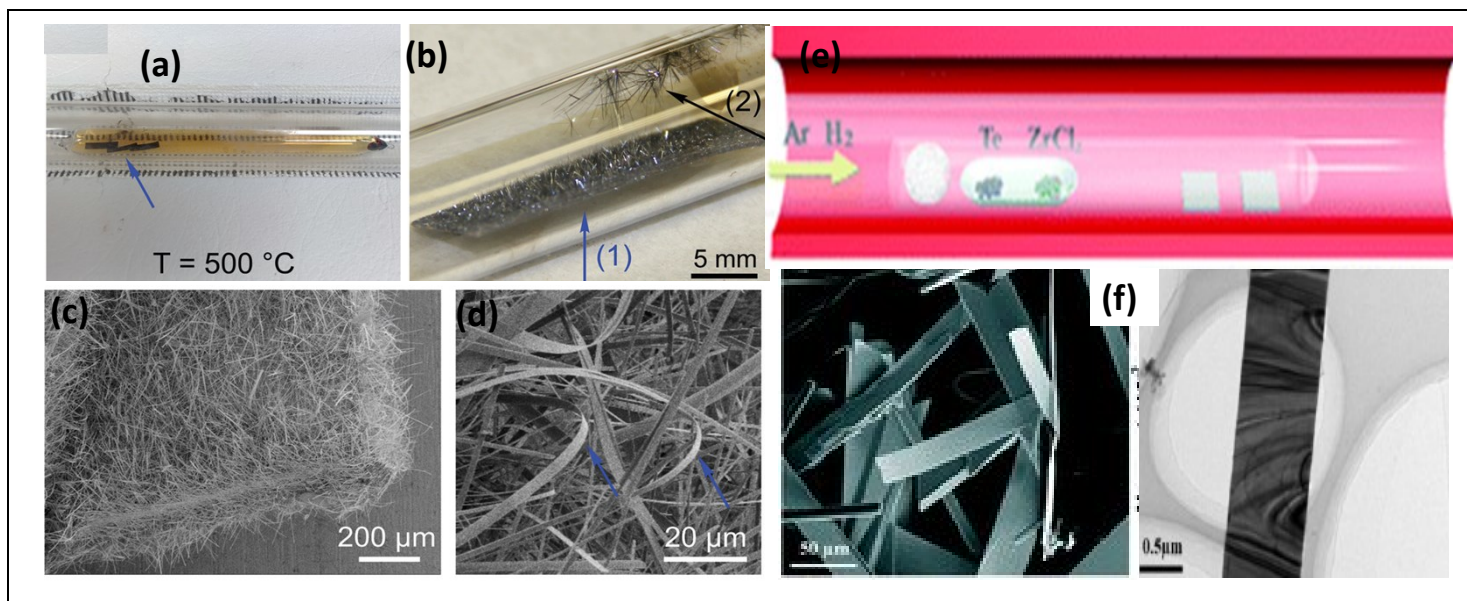

**Figure 8:** Synthesis of  $\text{MX}_3$ : Optical photograph of the ampoule (a) before and (b) after the growth of  $\text{TiS}_3$  whiskers on Ti foil and surface of quartz. (c, d) SEM images of grown  $\text{TiS}_3$  whiskers with arrow marks indicating the samples collected from the respective positions, Reproduced with permission from ref. no.-124, copyright (2015) Royal Society of Chemistry (e) Synthesis of  $\text{ZrTe}_3$  by chemical vapour deposition approach, (f) FESEM and TEM image of  $\text{ZrTe}_3$ , Republished with permission from ref. no.-130; permission conveyed through Copyright Clearance Center, Inc.

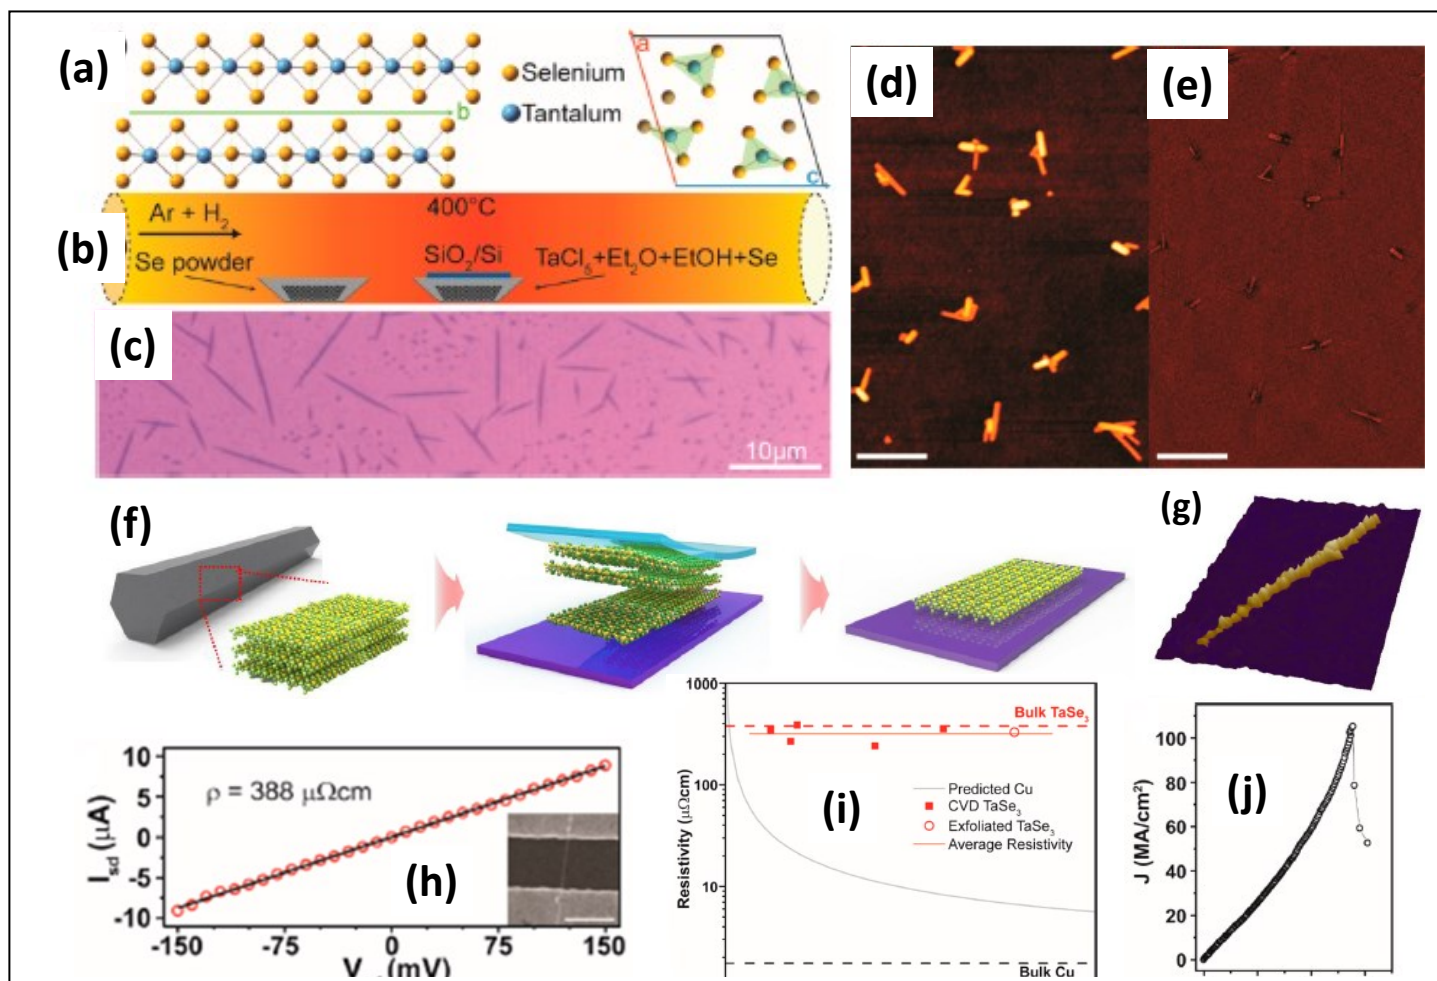

Figure 9: (a) Crystallographic structure of TaSe<sub>3</sub>, (b) schematic diagram of the CVD set up for the growth of TaSe<sub>3</sub> nanowires, (c) optical image and (d, e) SEM image of a population of TaSe<sub>3</sub> nanowires, Reprinted with permission from Ref. no-78, copyright (2019) American chemical Society (f) schematic illustration of mechanical exfoliation of TaSe<sub>3</sub> flakes from bulk TaSe<sub>3</sub>, (g) 3D monolayer of a quasi-1D TaSe<sub>3</sub> nanoribbon on SiO<sub>2</sub>/Si substrate, Reproduced with permission from ref. no.-107, copyright (2019) Multidisciplinary Digital Publishing Institute, (h) source-drain current vs. voltage for a 11.6 nm TaSe<sub>3</sub> nanowire in a 2 electrode configuration with inset showing the SEM image of the device, (i) resistivity as a function of bundle width of CVD grown TaSe<sub>3</sub> nanowire and comparison with bulk Cu and exfoliated TaSe<sub>3</sub>, (j) current density response of a 7x7 nm<sup>2</sup> nanowire as a function of  $V_{ds}$  with a failure at current density of 108 A/cm<sup>2</sup>, , Reprinted with permission from Ref. no-78, copyright (2019) American chemical Society.

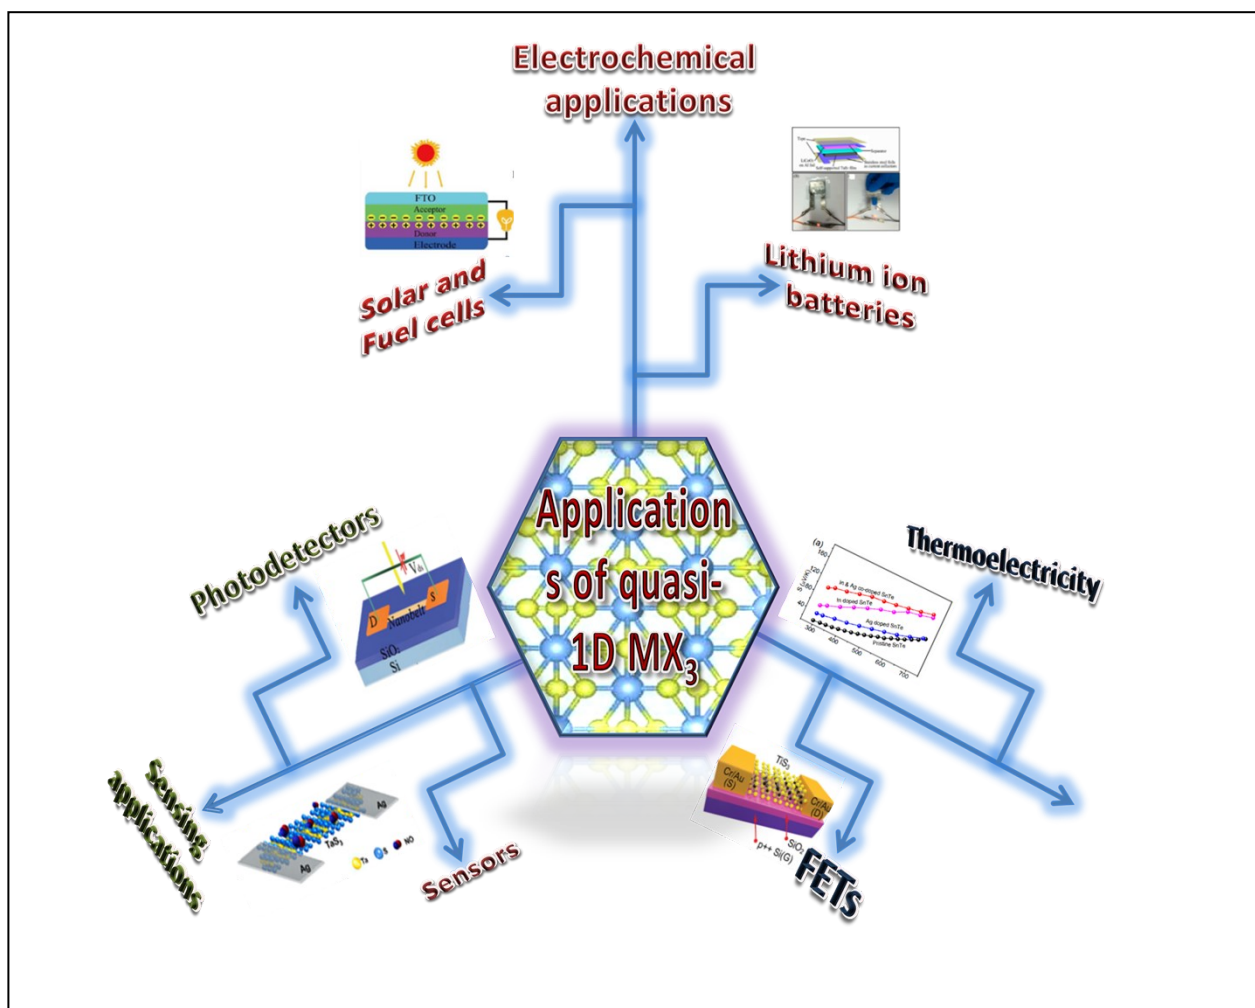

**Figure 10:** Schematic diagram showing various applications of  $\text{MX}_3$ , solar and fuel cell fig.- Republished with permission from ref. no.-33; permission conveyed through Copyright Clearance Center, Inc, lithium ion batteries fig.- Reprinted with permission from Ref. no-134, copyright 2015 American chemical Society, sensors fig.- Reprinted with permission from Ref. no-133, copyright (2018) American Chemical Society, photodetectors fig.- Republished with permission from ref. no.-129; permission conveyed through Copyright Clearance Center, Inc, FETs fig.-Reproduced with permission from ref. no.-124, copyright (2015) Royal Society of Chemistry, thermoelectricity fig.- Republished with permission from ref. no.-157; permission conveyed through Copyright Clearance Center, Inc, central str. Fig.- reproduced with permission from Ref- (6), copyright (2015) Springer Nature

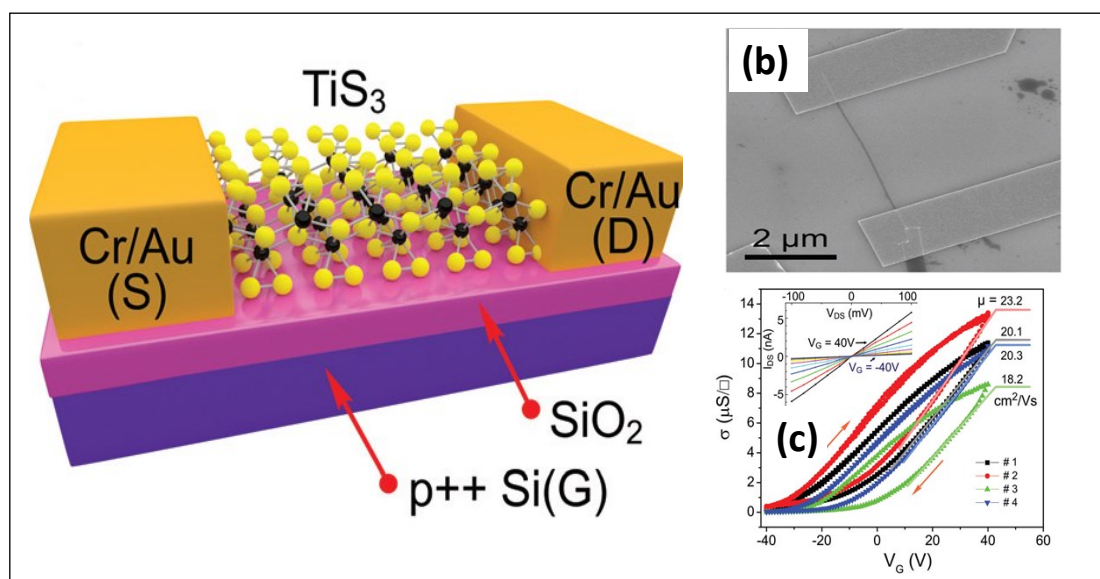

**Figure 11:** Few layered  $\text{TiS}_3$  FETs (a) schematic and (b) SEM image of a typical FET, (c) Conductivity vs. gate voltage dependencies for four different fabricated FETs with the inset showing the drain source current vs. drain source voltage dependencies at different gate voltages. Electrical characterization of  $\text{TiS}_3$  nanosheets, Reproduced with permission from ref. no.-124, copyright (2015) Royal Society of Chemistry.

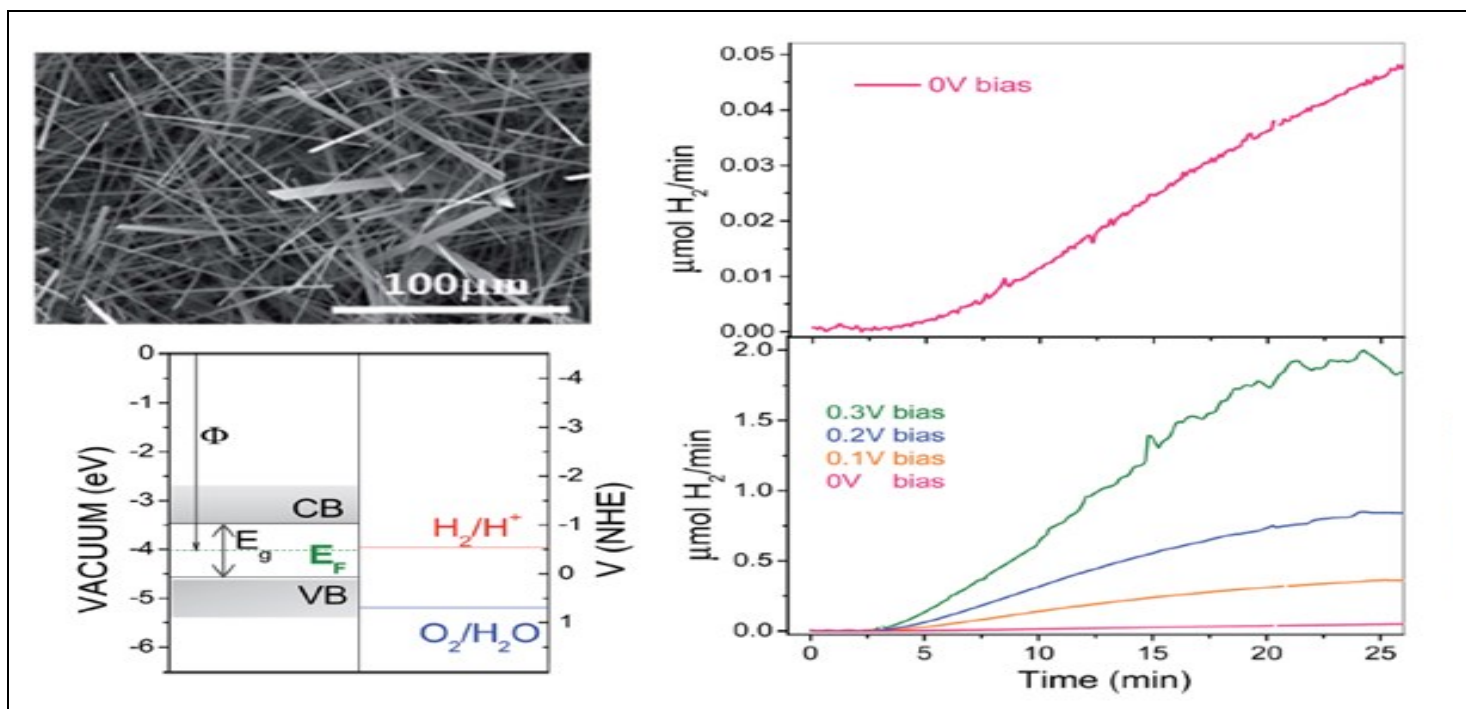

**Figure 12:** Hydrogen photogeneration properties of MX<sub>3</sub> nanostructures: (a) SEM image, (b) conduction and valence band energy levels in potentials (V vs. NHE) and energy (eV vs. vacuum) scales with redox potentials for the water-splitting half reactions at pH =9.0 vs NHE of TiS<sub>3</sub> nanoribbons. Hydrogen evolution flow of TiS<sub>3</sub> nanoribbons at (c) 0.0 V (d) at different bias potentials, Republished with permission from ref. no.-144; permission conveyed through Copyright Clearance Center, Inc.

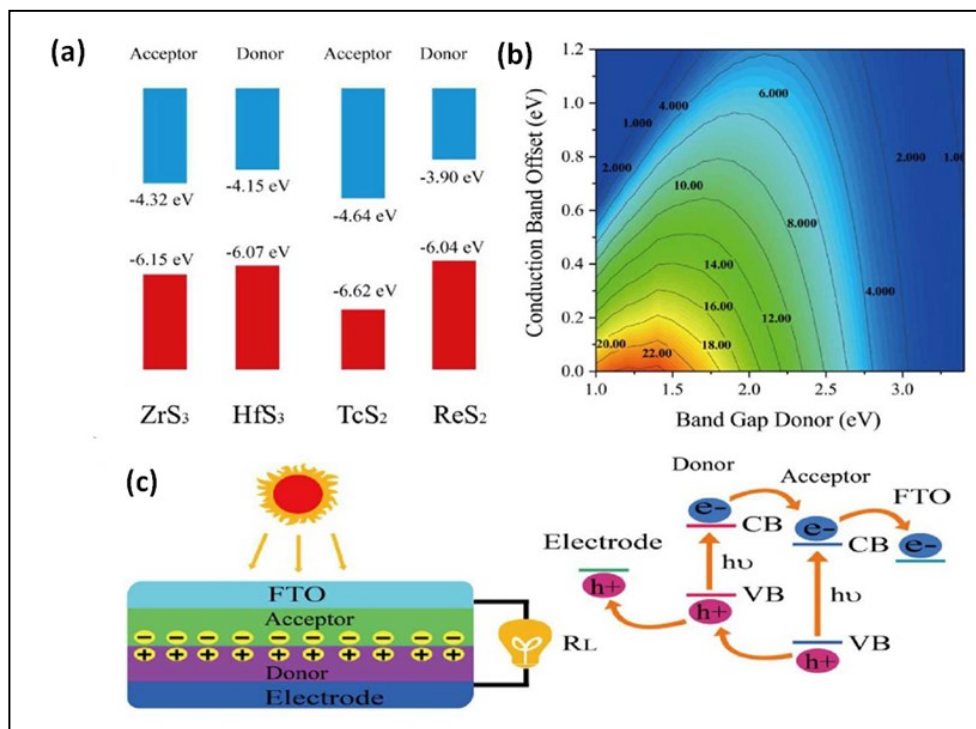

**Figure 13:** Application of MX<sub>3</sub> heterostructures for solar cells: (a) Band offsets of ZrS<sub>3</sub>/HfS<sub>3</sub> and TcS<sub>2</sub>/ReS<sub>2</sub> with the vacuum level as zero reference, (b) PCE contour obtained as a function of donor band gap and conduction band offset, (c) schematic illustration of thin film solar cells with mechanism, Republished with permission from ref. no.-33; permission conveyed through Copyright Clearance Center, Inc.

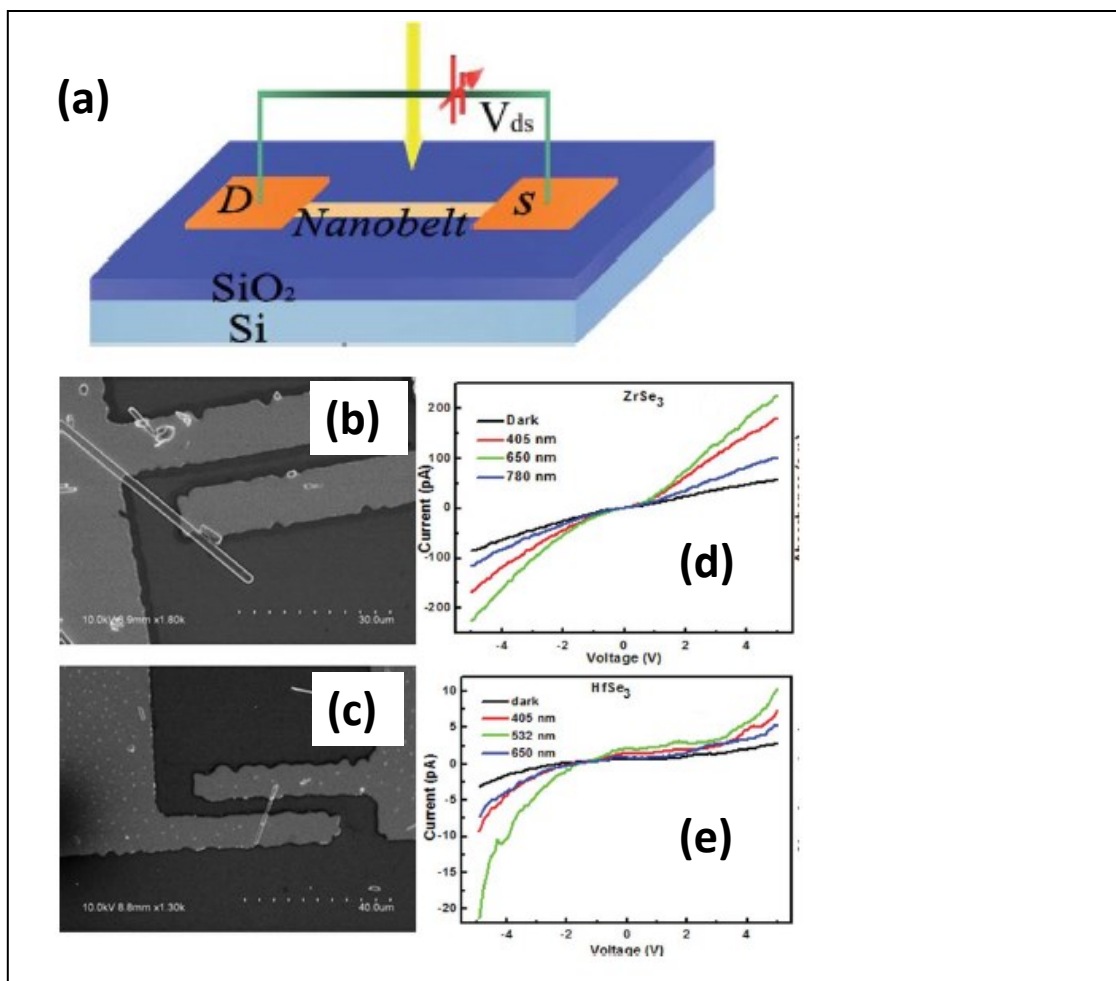

**Figure 14:** (a) schematic illustration of the ZrSe<sub>3</sub> and HfSe<sub>3</sub> single nanobelt photodetector, SEM images of (b) ZrSe<sub>3</sub>, (c) HfSe<sub>3</sub> photodetector, I-V characteristics of the (d) ZrSe<sub>3</sub>, (e) HfSe<sub>3</sub> nanobelt photodetector, Republished with permission from ref. no.-129; permission conveyed through Copyright Clearance Center, Inc.

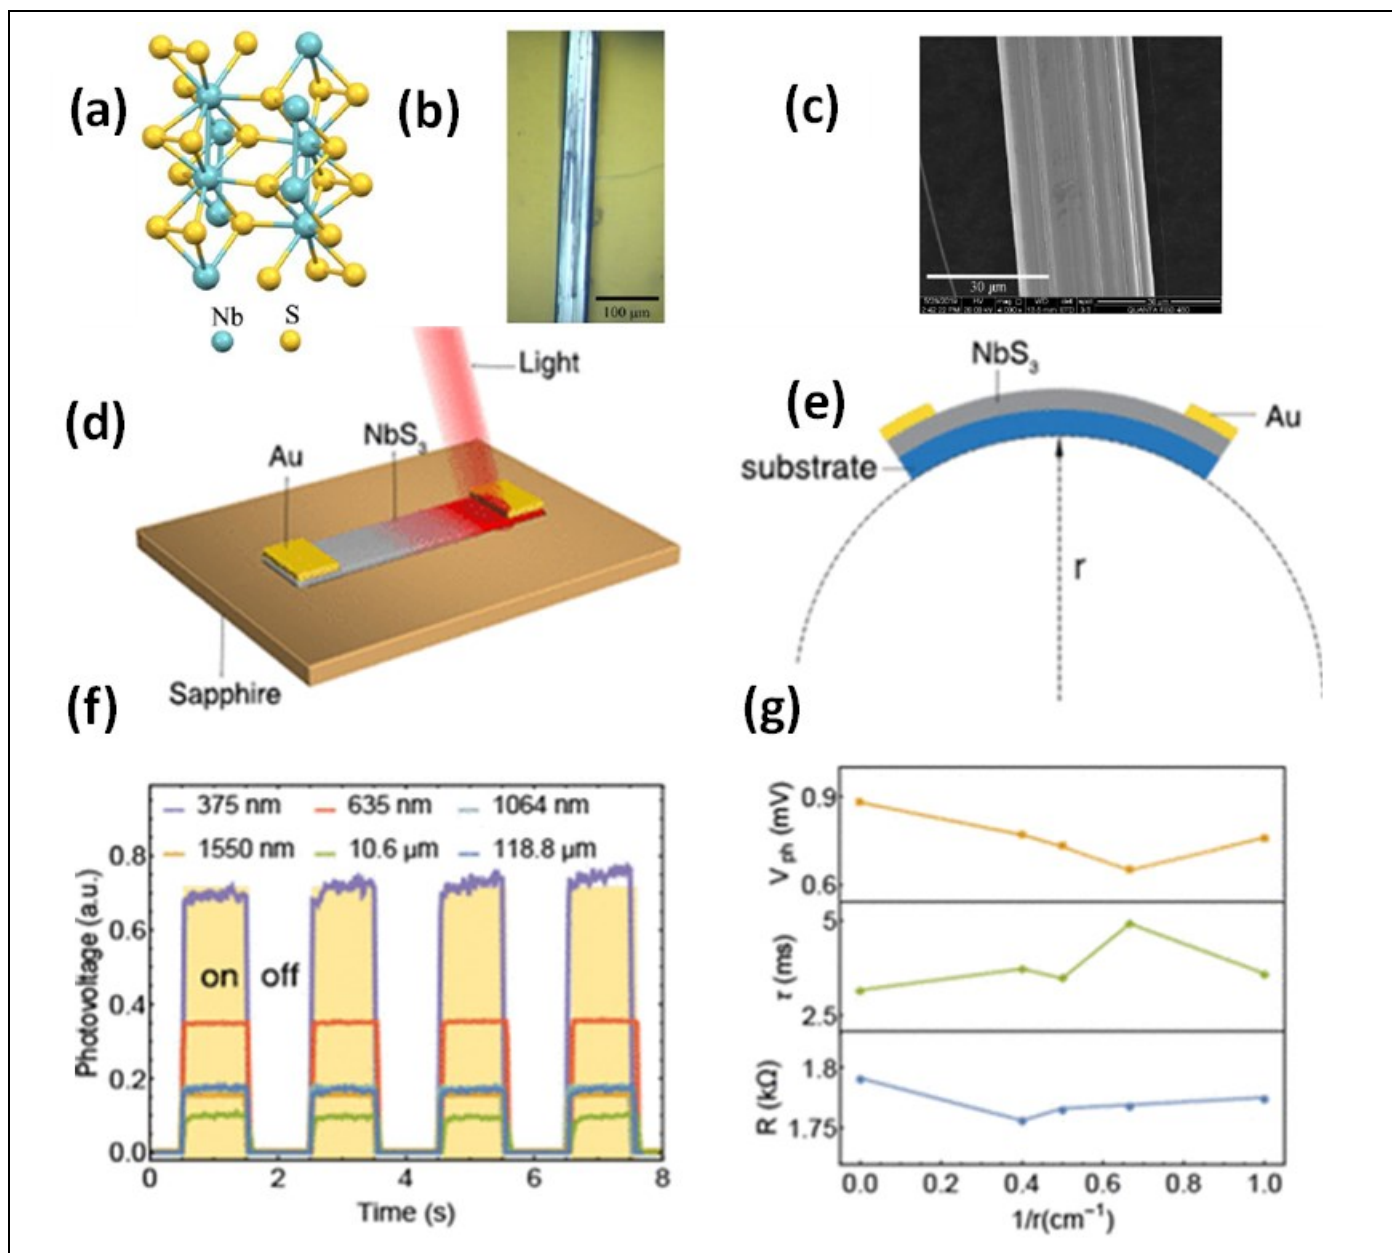

**Figure 15:** (a) Crystal structure of NbS<sub>3</sub>, (b) Optical microscopic and (c) SEM image of NbS<sub>3</sub> crystal. (d) schematic diagram of a (d) NbS<sub>3</sub> photodetector and (e) bending condition, (f) on-off curves of photovoltage at room temperature and (g) resistance, response time and photovoltage under different bending condition, Reprinted with permission from Ref. no-151, copyright (2020) American Chemical Society

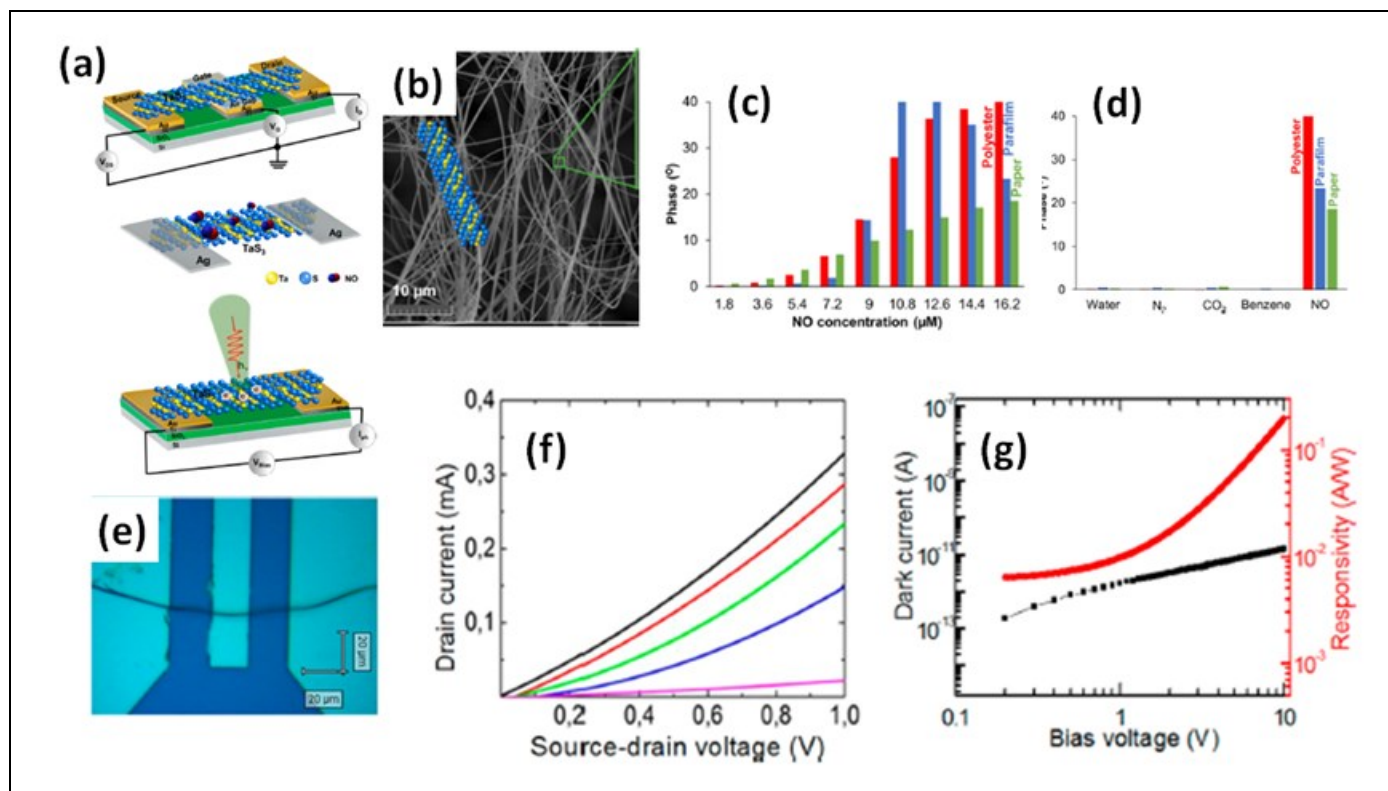

**Figure 16:** (a) Schematic representation of the FET, NO gas sensor and photodetector based on TaS<sub>3</sub> nanofiber, (b) SEM image of the TaS<sub>3</sub> nanofibers, (c) impedance phase response of the gas sensor fabricated on different substrates (polyester, parafilm, paper) as functions of NO concentrations, (d) selectivity studies of the sensors fabricated on different substrates, (e) optical image of a FET based on TaS<sub>3</sub> fiber, (f) FET transistor characteristics curves at different gate voltages (violet: -1 V, blue: 0 V, green: 1V, red: 2V, black: 3V), (g) dark (black) and its responsivity (red) curves, Reprinted with permission from Ref. no-133, copyright (2018) American Chemical Society

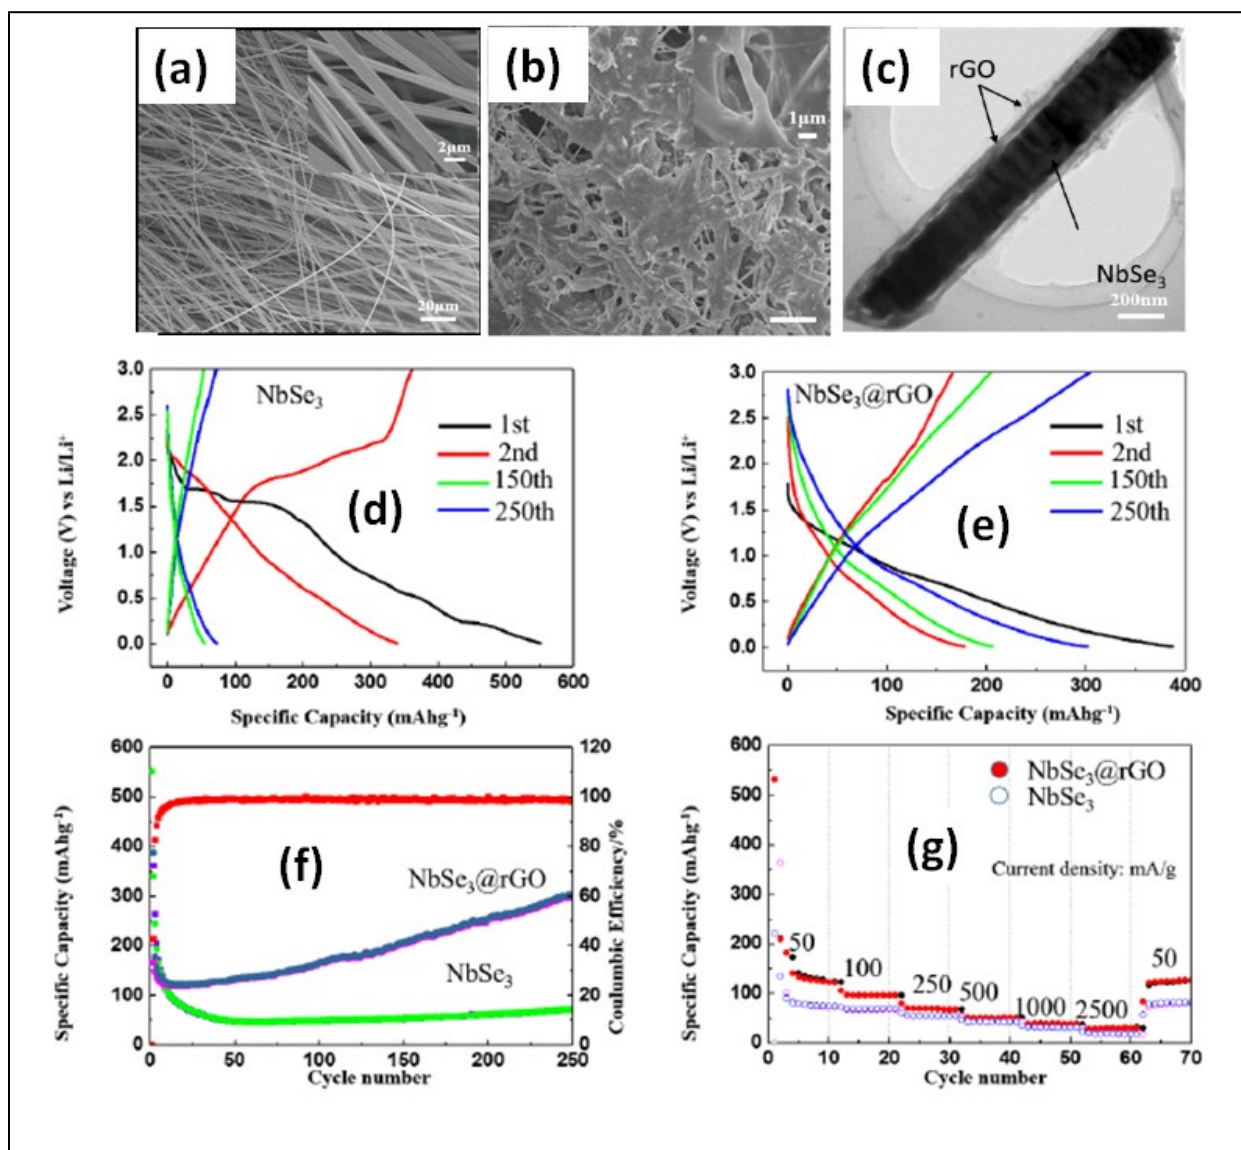

**Figure 17:** SEM images of (a) NbSe<sub>3</sub> and (b) NbSe<sub>3</sub>@rGO, (c) TEM image of NbSe<sub>3</sub>@rGO. Electrochemical performance of NbSe<sub>3</sub> and NbSe<sub>3</sub>@rGO in the voltage range of 0.005–3 V vs. Li/Li<sup>+</sup>. Discharge and charge curves of (d) NbSe<sub>3</sub> and (e) nanobelts. (f) Cycling performance of NbSe<sub>3</sub>@rGO and NbSe<sub>3</sub> nanobelts at a current density of 100 mA/g. (g) Rate performance of NbSe<sub>3</sub>@rGO and NbSe<sub>3</sub> nanobelts, Reprinted from ref. no-155, Copyright (2017) with permission from Elsevier.

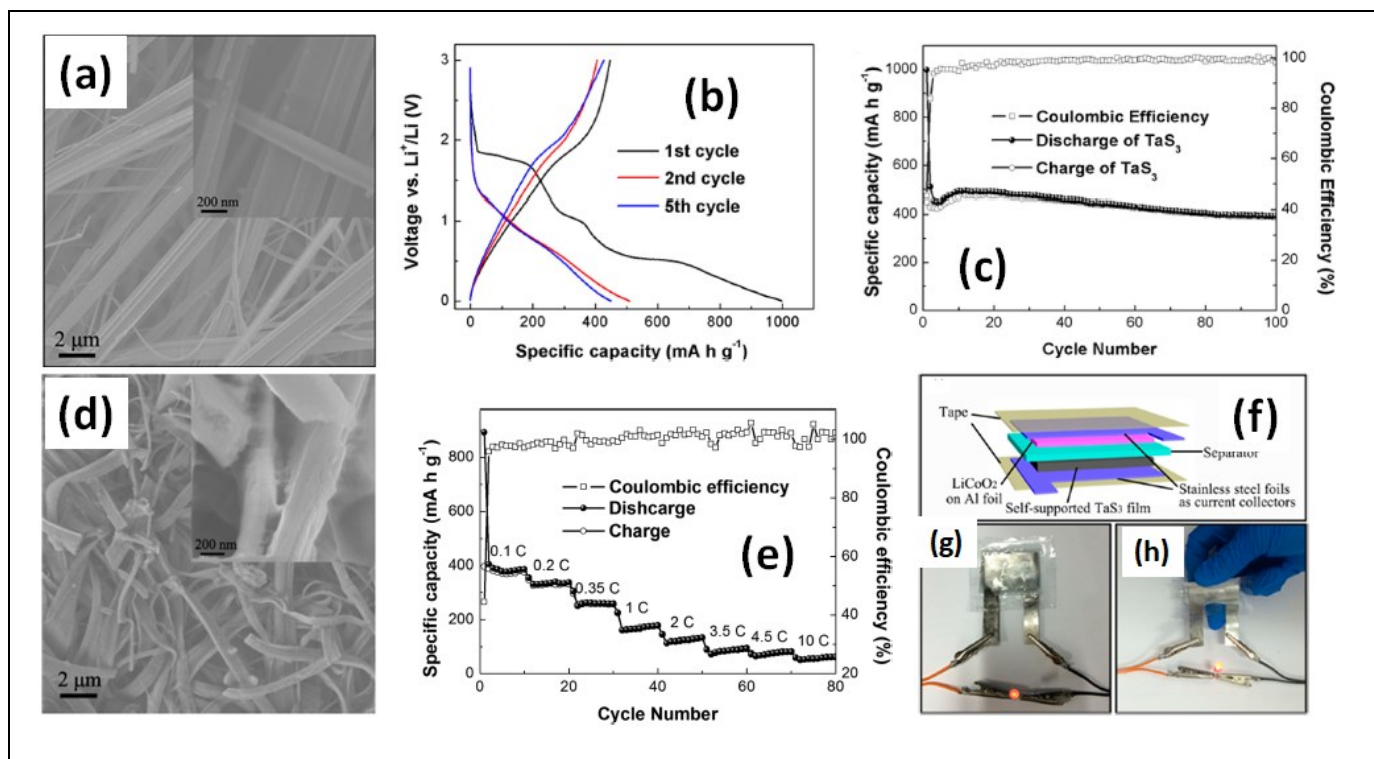

**Figure 18:** (a) SEM image of TaS<sub>3</sub> nanowires, (b) voltage profiles of lithium ion battery based on TaS<sub>3</sub> nanowires cycled between 0.001 and 3 V vs. Li<sup>+</sup>/Li at a cycling rate of 0.1C, (c) Capacity and columbic efficiency-cycle number curves of TaS<sub>3</sub> nanowire curves of TaS<sub>3</sub> nanowire electrode at a cycling rate of 0.1C, (d) SEM image of the nanowires after long cycling tests, (e) rate performance and columbic efficiency-cycle number curves of TaS<sub>3</sub> electrodes as a function of discharge rate (0.1-10C) (f-h) schematic of the fabricated flexible lithium ion battery with photographs showing glowing of LED under flat and bent states, Reprinted with permission from Ref. no-134, copyright (2015) American chemical Society
